# Supplementary material
Source: publisher figshare collection journal article supplement (https://acs.figshare.com/ndownloader/files/3755482)
Supplement: Supplementary file 1 [file 3755482]

# Supporting Information

## **Aqueous Solution-Phase Selenized CuIn(S,Se)<sub>2</sub> Thin Film Solar Cells Annealed under Inert Atmosphere**

*Yunjung Oh,<sup>†</sup> Wooseok Yang,<sup>†</sup> Jimin Kim,<sup>†</sup> Kyoohee Woo,<sup>‡</sup> and Jooho Moon<sup>†,\*</sup>*

<sup>†</sup>Department of Materials Science and Engineering, Yonsei University

50 Yonsei-ro Seodaemun-gu, Seoul, 120-749, Republic of Korea

<sup>‡</sup>Advanced Manufacturing Systems Research Division, Korea Institute of Machinery and

Materials, 156 Gajeongbuk-ro, Yuseong-gu, Daejeon 305-343, Republic of Korea

\*Corresponding author, e-mail: [jmoon@yonsei.ac.kr](mailto:jmoon@yonsei.ac.kr), tel.: +82-2-2123-2855, fax: +82-2-365-5882.

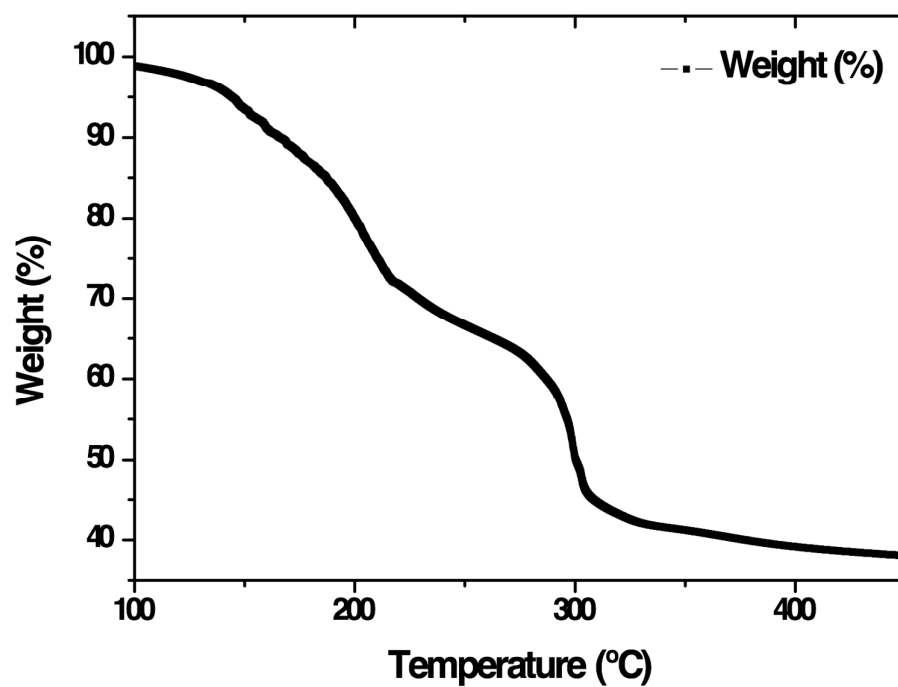

**Figure S1.** TG analysis of aqueous-based Cu-In-S ink. This analysis was performed in an air atmosphere at  $150 \text{ cc min}^{-1}$  with a heating rate of  $10 \text{ }^{\circ}\text{C min}^{-1}$ .

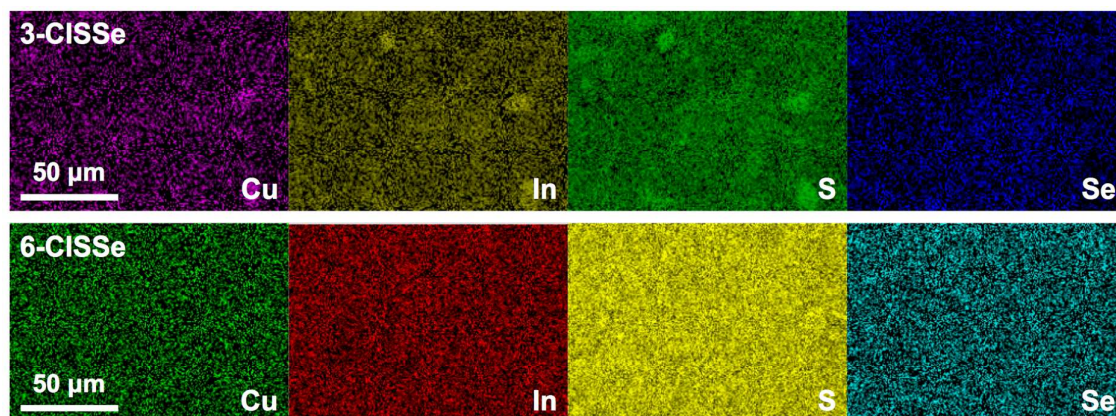

**Figure S2.** Compositional mapping images of CISSe film surfaces.

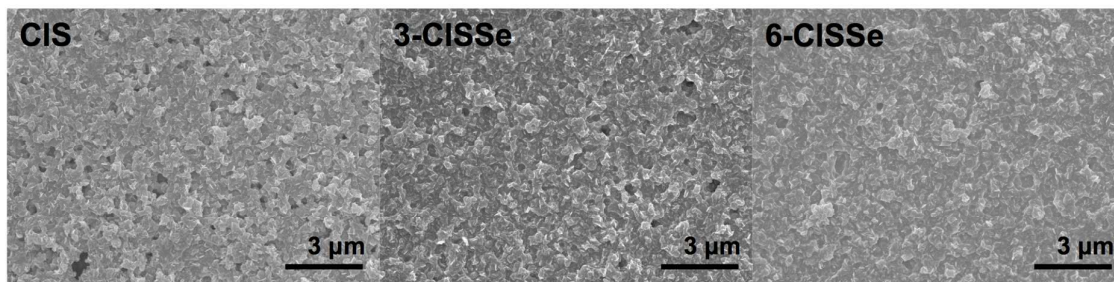

**Figure S3.** Surface microstructure of the as-prepared CIS/CISSe absorber layer.

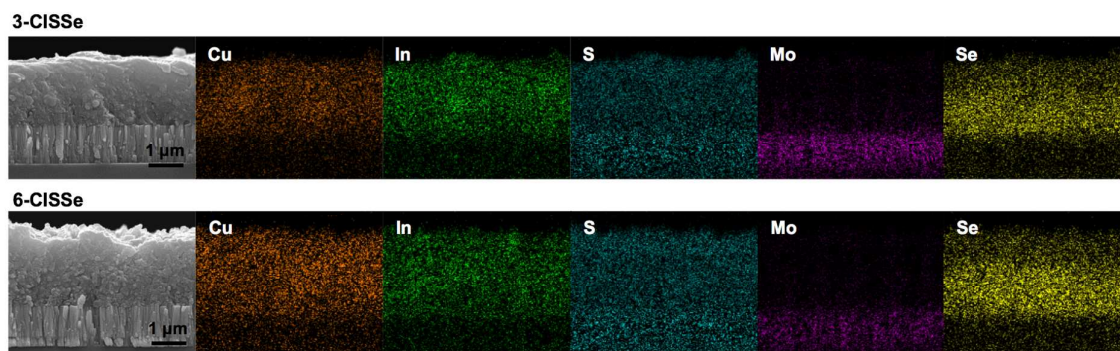

**Figure S4.** Cross-sectional EDX mapping of ASP-CISSe layers deposited on Mo/SLG substrate.

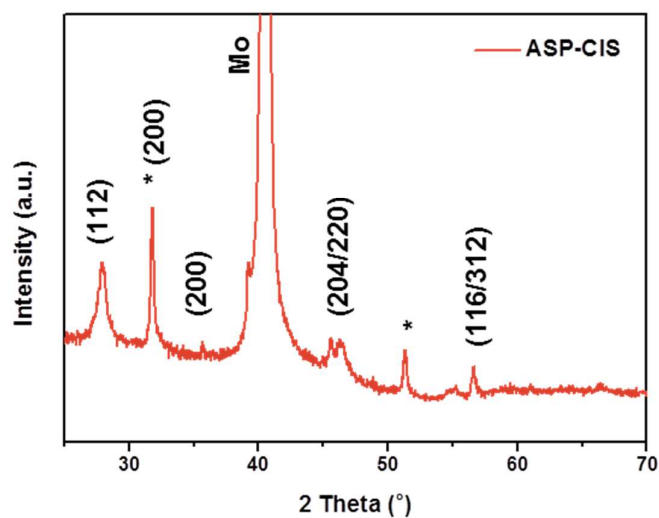

**Figure S5.** XRD results for ASP-CIS film deposited on Mo-coated substrate. All samples were dried in ambient air at 300 °C. Asterisks in the figure indicate binary metal sulfide secondary phase.

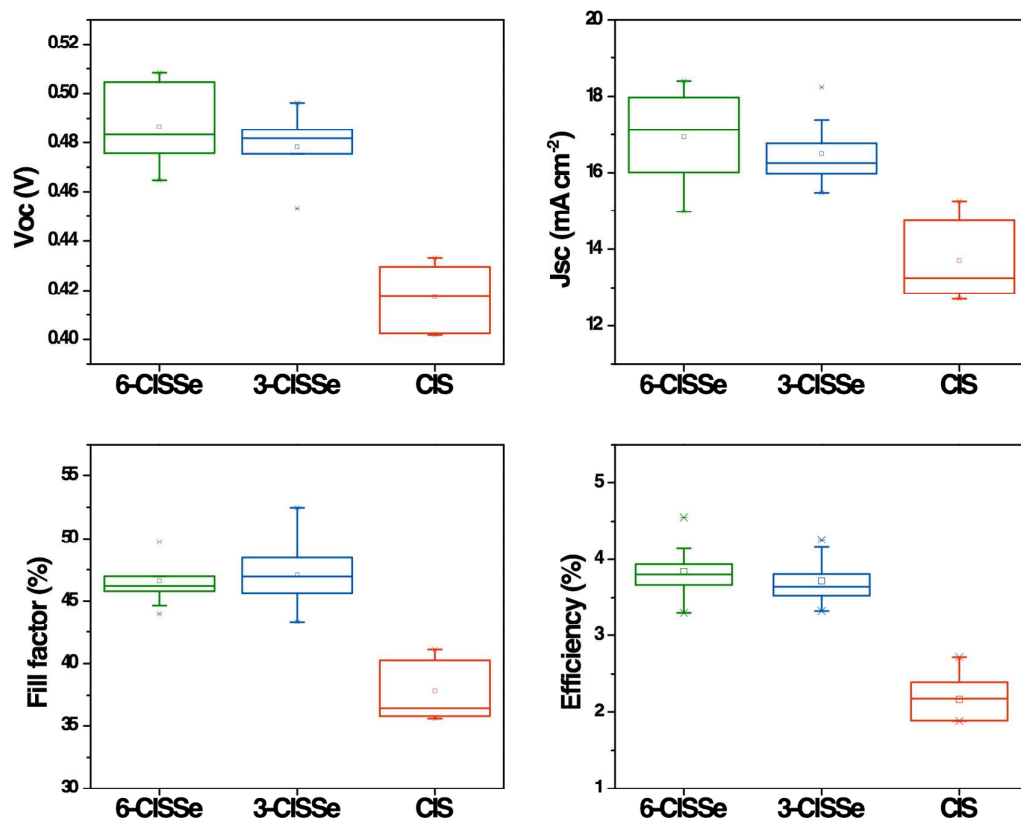

**Figure S6.**  $V_{oc}$ ,  $J_{sc}$ , FF, and efficiency of CIS/CISse solar cells.

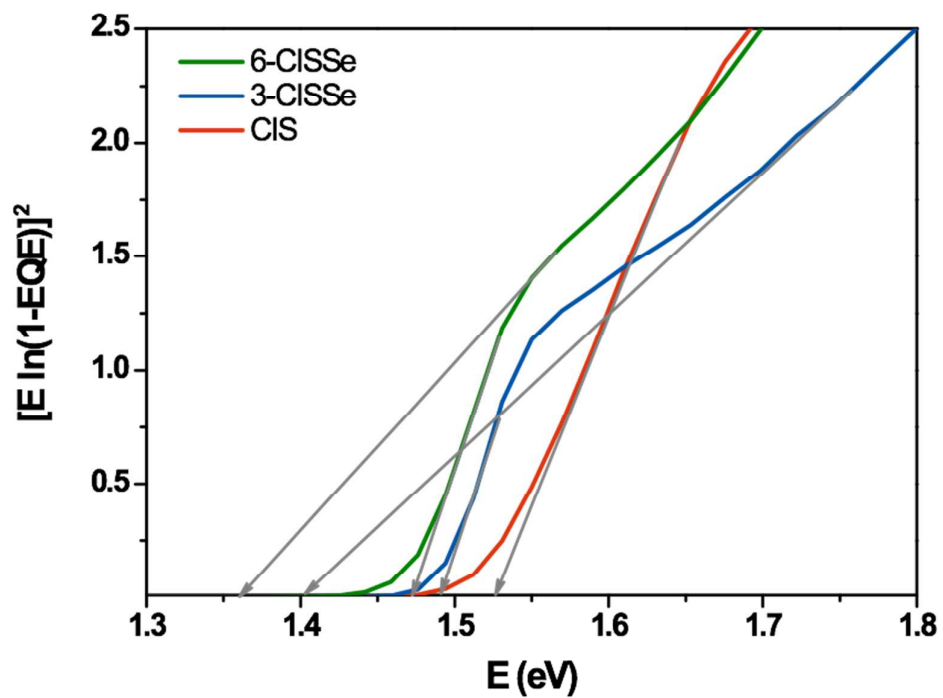

**Figure S7.** The band gap of CIS was determined to be 1.53 eV by fitting a plot of  $[E \ln(1-EQE)]^2$  vs.  $E$  near the band edge. 3-CISSe and 6-CISSe had band gaps in the range of 1.40 – 1.49 eV and 1.36 – 1.46 eV, respectively.
